# Supplementary material for: Changes in JC Virus-Specific T Cell Responses during Natalizumab Treatment and in Natalizumab-Associated Progressive Multifocal Leukoencephalopathy
Source: PubMed Central journal article supplement (PMC3493478; doi:10.1371/journal.ppat.1003014), 2012-11-08
Supplement: ppat.1003014.s002.pdf [file ppat.1003014.s002.pdf]

Control

VP1

IL-10 APC

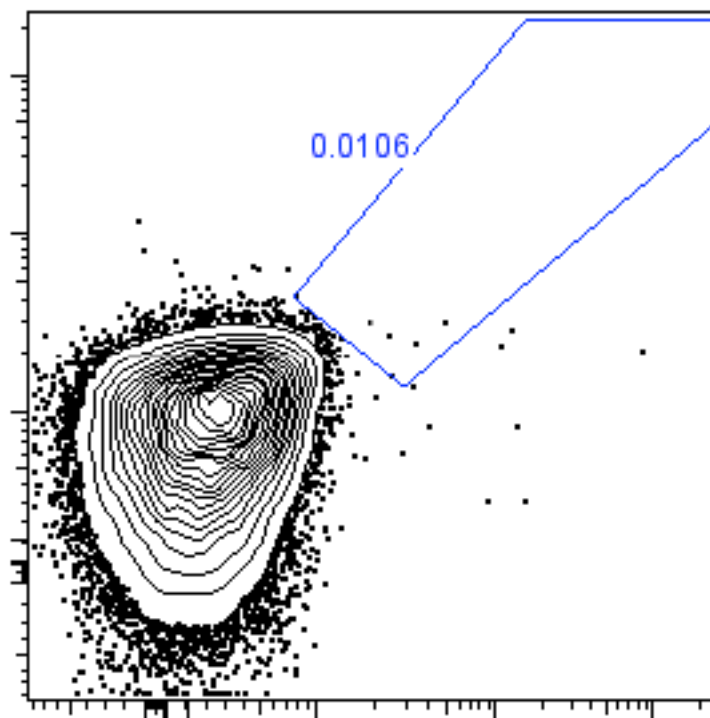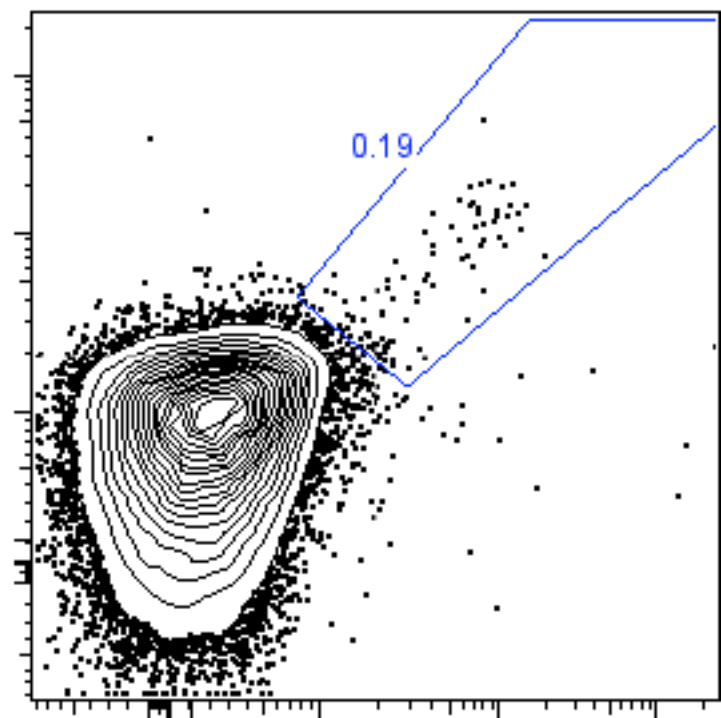

IL-10 PE
